# Supplementary material for: Kinetics of oxidation of nitrosodisulfonate anion radical with a metallo-superoxide
Source: Royal Society of Chemistry journal article supplement (doi:10.1039/c2dt12019d), 2012-01-01
Supplement: c2dt12019d.pdf [file c2dt12019d.pdf]

## ELECTRONIC SUPPORTING INFORMATION

### Kinetics of oxidation of nitrosodisulfonate anion radical with a metallo-superoxide

Kaustab Mandal\* and Rupendranath Banerjee

Department of Chemistry, Jadavpur University, Kolkata-700 032, India.

E-mail: [kaustab2008@gmail.com](mailto:kaustab2008@gmail.com)

| Contents                                                                      | Page |
|-------------------------------------------------------------------------------|------|
| <b>Table S1.</b> Stoichiometric results.                                      | S2   |
| <b>Table S2.</b> Effect of D <sub>2</sub> O on $k_{\text{obs}}$ .             | S5   |
| <b>Figure S1.</b> Bronsted plot of $\log(k_{\text{obs}})$ vs $I^{1/2}$        | S6   |
| <b>Table S3.</b> Comparison of rate constants of HDS with NDS <sup>2-</sup> . | S7   |
| Derivation of rate law.                                                       | S8   |

**Table S1a.** Stoichiometric results in the presence of excess **1** over NDS<sup>2-</sup>.

[**1**] = 1.0 mM, [NDS<sup>2-</sup>] = 0.25 mM, pH = 5.6,  $T_{OAc}$  = 0.10 M and  $T = 25.0 (\pm 0.1) ^\circ\text{C}$ .

$\Delta[\text{NDS}^{2-}] = 0.25 \text{ mM}$ .

| No. of observation | Initial absorbance at 670 nm | Final absorbance at 670 nm | Amount of <b>1</b> reacted (mole lit <sup>-1</sup> ) | $\Delta[\mathbf{1}]/\Delta[\text{NDS}^{2-}]$ |
|--------------------|------------------------------|----------------------------|------------------------------------------------------|----------------------------------------------|
| 1.                 | 0.830                        | 0.412                      | 0.504                                                | 2.016                                        |
| 2.                 | 0.830                        | 0.410                      | 0.506                                                | 2.024                                        |
| 3.                 | 0.830                        | 0.414                      | 0.501                                                | 2.004                                        |

**Table S1b.** Collection of product gas.

**1** =  $0.25 \times 10^{-3}$  mole,  $\text{NDS}^{2-} = 2.5 \times 10^{-3}$  mole,  $T_{\text{OAc}} = 0.10$  M and  $T = 25.0^\circ\text{C}$ .

| pH   | ml. gas produced<br>at 25 °C | Moles of gas produced per<br>mole of <b>1</b> |
|------|------------------------------|-----------------------------------------------|
| 5.10 | 8.3                          | 1.48                                          |
| 5.35 | 8.3                          | 1.48                                          |
| 5.60 | 8.2                          | 1.46                                          |
| 5.85 | 8.3                          | 1.48                                          |

**Table S1c.** BaSO<sub>4</sub> produced on oxidation of NDS<sup>2-</sup>.

**1** = 0.25 x 10<sup>-3</sup> mole, NDS<sup>2-</sup> = 2.5 x 10<sup>-3</sup> mole and T<sub>OAc</sub> = 0.10 M.

| pH   | Amount of BaSO <sub>4</sub> |                          | Moles of BaSO <sub>4</sub> produced per mole of <b>1</b> |
|------|-----------------------------|--------------------------|----------------------------------------------------------|
|      | gm                          | mole                     |                                                          |
| 5.10 | 0.0601                      | 0.257 x 10 <sup>-3</sup> | 1.03                                                     |
| 5.35 | 0.0595                      | 0.255 x 10 <sup>-3</sup> | 1.02                                                     |
| 5.60 | 0.0599                      | 0.257 x 10 <sup>-3</sup> | 1.03                                                     |
| 5.85 | 0.0590                      | 0.253 x 10 <sup>-3</sup> | 1.01                                                     |

**Table S2.** Effect of D<sub>2</sub>O on  $k_{\text{obs}}$ .

[**1**] = 0.20 mM, [NDS<sup>2-</sup>] = 4 mM, pH = 5.85,  $T_{\text{OAc}}$  = 0.10 M,  $I$  = 1.5 (NaCl) M and  $T$  = 25.0 ( $\pm$  0.1) °C.

| % of D <sub>2</sub> O (v/v) | $10^3 k_{\text{obs}}$ (s <sup>-1</sup> ) |
|-----------------------------|------------------------------------------|
| 0                           | 7.75                                     |
| 20                          | 7.80                                     |
| 40                          | 7.75                                     |
| 60                          | 7.80                                     |
| 80                          | 7.85                                     |

**Figure S1.** Bronsted plot of  $\log(k_{\text{obs}})$  vs  $I^{1/2}$

$[1] = 0.2 \text{ mM}$ ,  $[\text{NDS}^{2-}] = 4.0 \text{ mM}$ ,  $\text{pH} = 5.35$ ,  $T_{\text{OAc}} = 0.10 \text{ M}$  and  $T = 25.0 (\pm 0.1) \text{ }^\circ\text{C}$ .

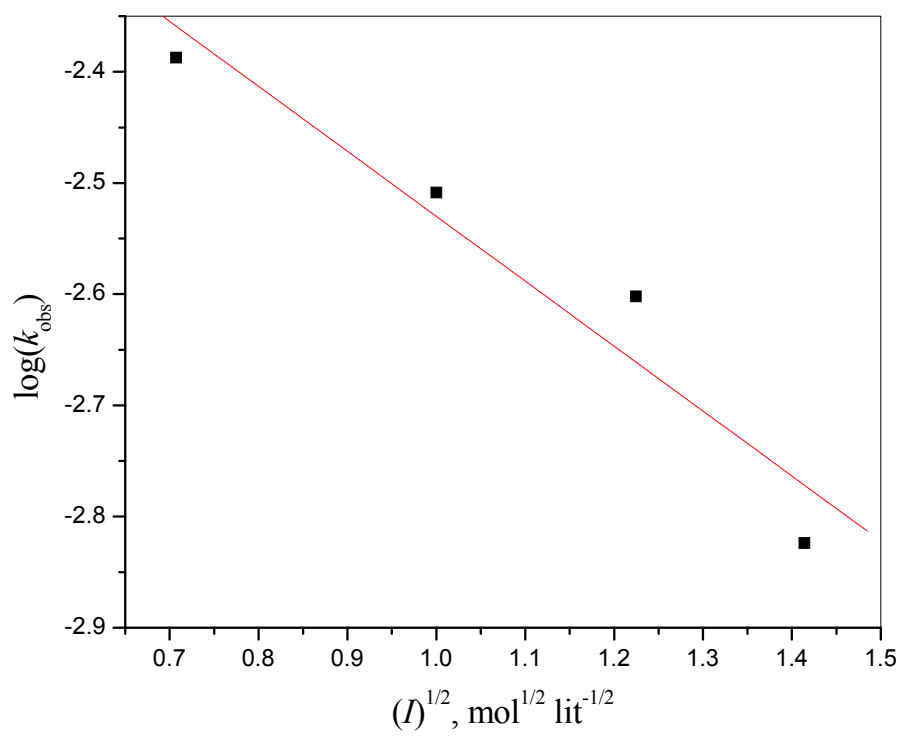

**Table S3.** Comparison of rate constants<sup>†</sup> of HDS with NDS<sup>2-</sup>.

[**1**] = 0.20 mM,  $T_{\text{OAc}}$  = 0.10 M,  $I$  = 1.5 (NaCl) M and  $T$  = 25.0 ( $\pm$  0.1) °C.

| Reducing agent    | Concentration<br>(mM) | pH  | $10^3 k_{\text{obs}}$ (s <sup>-1</sup> ) |
|-------------------|-----------------------|-----|------------------------------------------|
| HDS               | 2.0                   | 5.0 | 8.1                                      |
| HDS               | 2.0                   | 5.5 | 25.0                                     |
| HDS               | 5.0                   | 5.0 | 14.2                                     |
| HDS               | 5.0                   | 5.5 | 44.3                                     |
| NDS <sup>2-</sup> | 2.0                   | 5.1 | 0.7                                      |
| NDS <sup>2-</sup> | 2.0                   | 5.6 | 2.1                                      |
| NDS <sup>2-</sup> | 5.0                   | 5.1 | 1.7                                      |
| NDS <sup>2-</sup> | 5.0                   | 5.6 | 5.5                                      |
| NDS <sup>2-</sup> | 6.0                   | 4.4 | 0.6 <sup>a</sup>                         |
| HDS               | 5.0                   | 4.5 | 5.0 <sup>a</sup>                         |

<sup>†</sup>All the rate constants ( $k_{\text{obs}}$ ) are counting by considering the stoichiometric factors.  
<sup>a</sup>At  $I$  = 1.0 (NaCl) M.

**Derivation of rate law:**

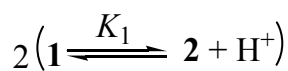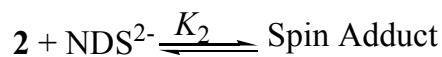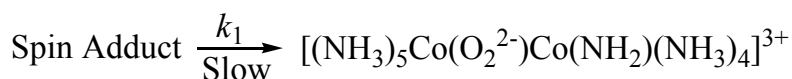

$$K_1 = \frac{[\mathbf{2}][\text{H}^+]}{[\mathbf{1}]} \quad \text{OR} \quad [\mathbf{2}] = \frac{K_1[\mathbf{1}]}{[\text{H}^+]}$$

$$K_2 = \frac{[\text{Spin Adduct}]}{[\mathbf{2}][\text{NDS}^{2-}]}$$

OR

$$[\text{Spin Adduct}] = K_2[\mathbf{2}][\text{NDS}^{2-}] = \frac{K_1 K_2 [\mathbf{1}][\text{NDS}^{2-}]}{[\text{H}^+]}$$

$$\text{Rate} = k_1[\text{Spin Adduct}] = \frac{k_1 K_1 K_2 [\mathbf{1}][\text{NDS}^{2-}]}{[\text{H}^+]} \quad \dots\dots(1)$$

Again, considering the stoichiometric factor

$$\text{Rate} = 2 k_{\text{obs}} \cdot [\mathbf{1}] \quad \dots\dots(2)$$

Comparing equation (1) and (2),

$$k_{\text{obs}} = \frac{0.5 k_1 K_1 K_2 [\text{NDS}^{2-}]}{[\text{H}^+]}$$
